# Supplementary material for: Understanding Early Elementary Children's Conceptual Knowledge of Plant Structure and Function through Drawings
Source: Atypon-hosted journal article supplement (doi:10.1187/cbe.13-12-0230), 2014-09-01

# Supplemental Material

*CBE—Life Sciences Education*

Anderson *et al.*

## Follow-Up Draw-A-Plant Interview

This is a follow-up interview to allow the researchers to gain insight into what the children drew in their plant pictures in order to accurately code the drawings. The questions are semi-structured in order to allow the students to clarify their work/drawings.

**Participant ID:** \_\_\_\_\_

**Grade:** \_\_\_\_\_

**Date of Interview:** \_\_\_\_\_

---

Hi! My name is: \_\_\_\_\_. Thank you for helping us out. We are interested in understanding what students like you know about plants structure and function. This interview will last about 20-30 minutes. It is important to note that:

- No teachers will have access to your comments
- There are no right or wrong answers to these questions. We just want to understand what you are thinking.

Also, let us know if you do not understand any of the questions that we are asking. Do you have any questions for us before we begin?

- 
1. Let's take a look at the drawing that you made of the plant. Can you tell me about it?
    - a. Probe for responses. (e.g. You said that was a stem, what do you think that does for the plant? Or What is it that you drew here? What does that do to help a plant?)
  2. How do you think a plant is able to live/survive? What do you think that it needs in order to live?
  3. Where do plants get their nutrients/food from?
  4. Can you sort these pictures into living things that you think are plants and those that are not plants?

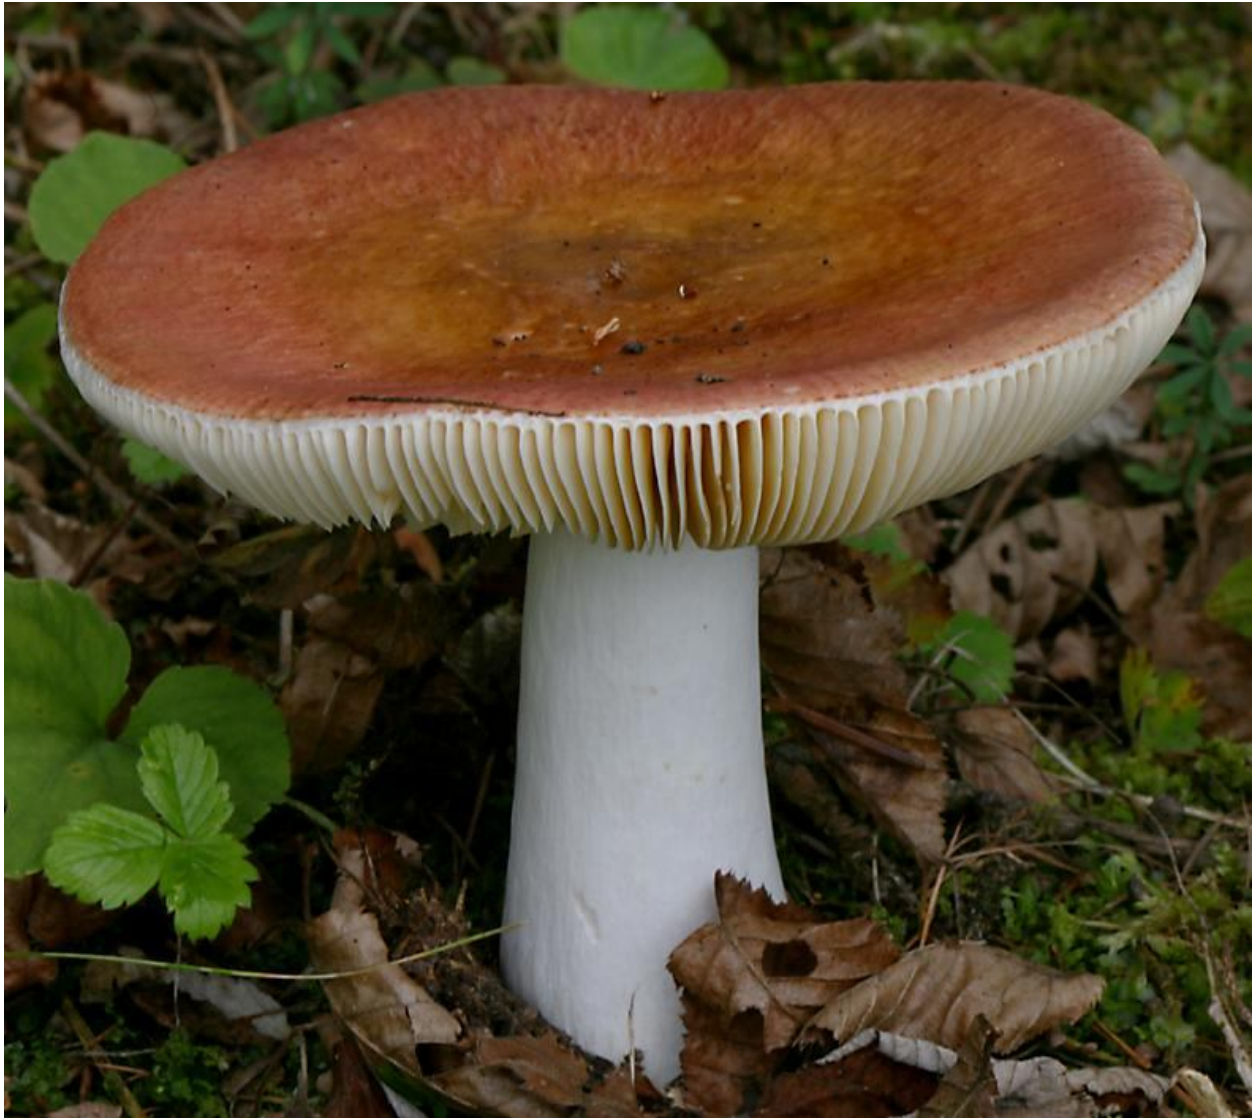

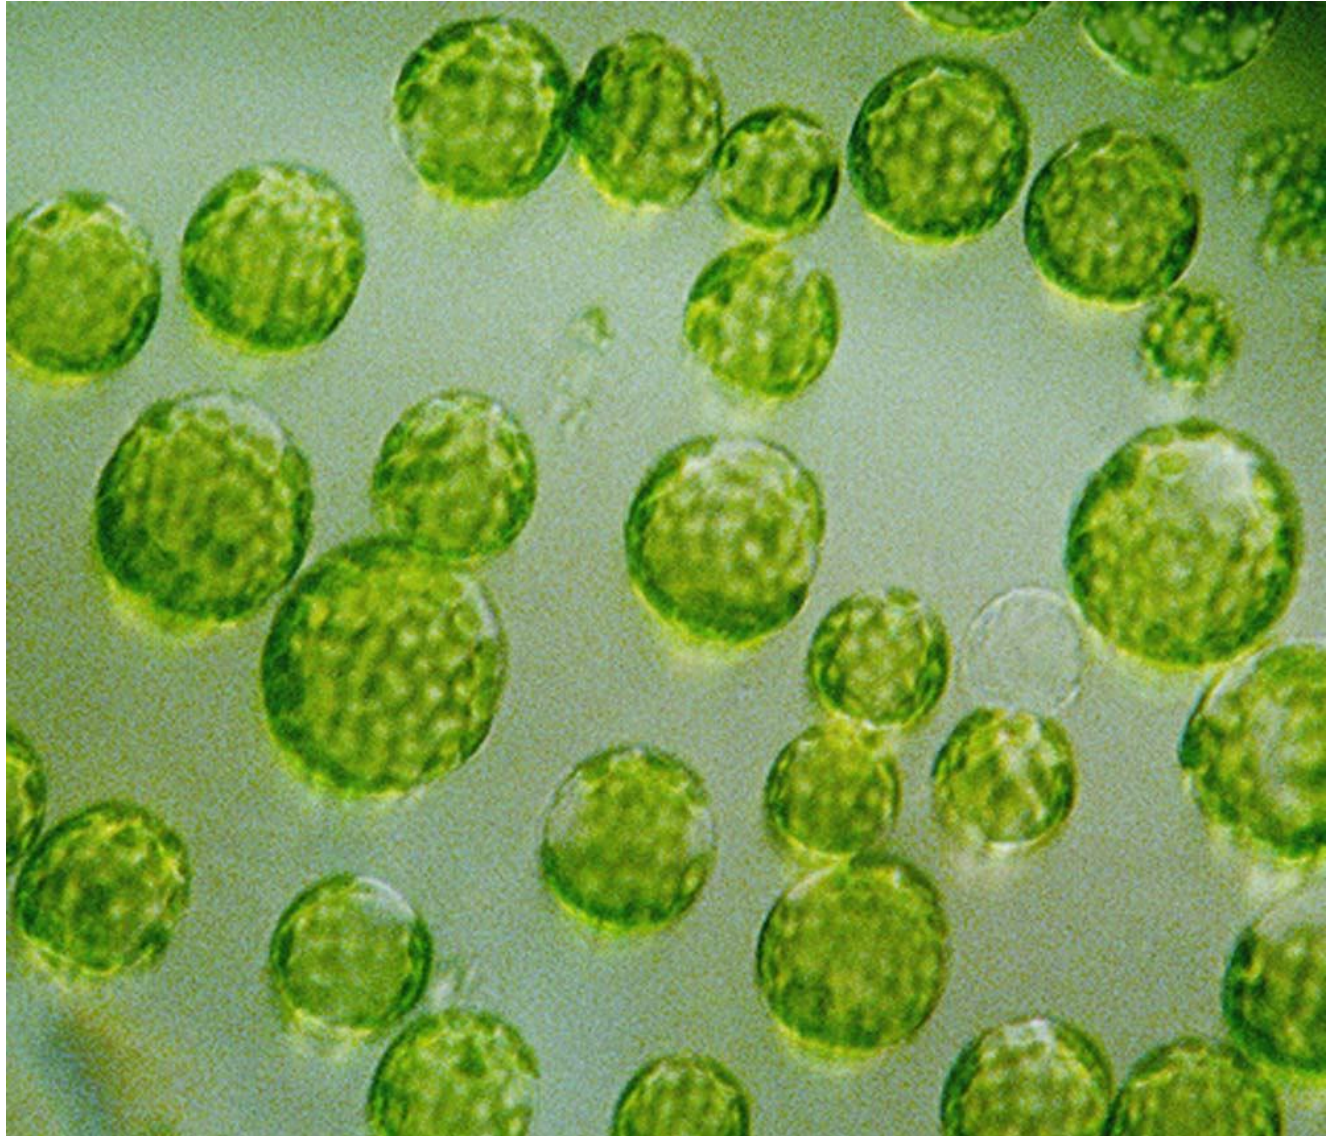

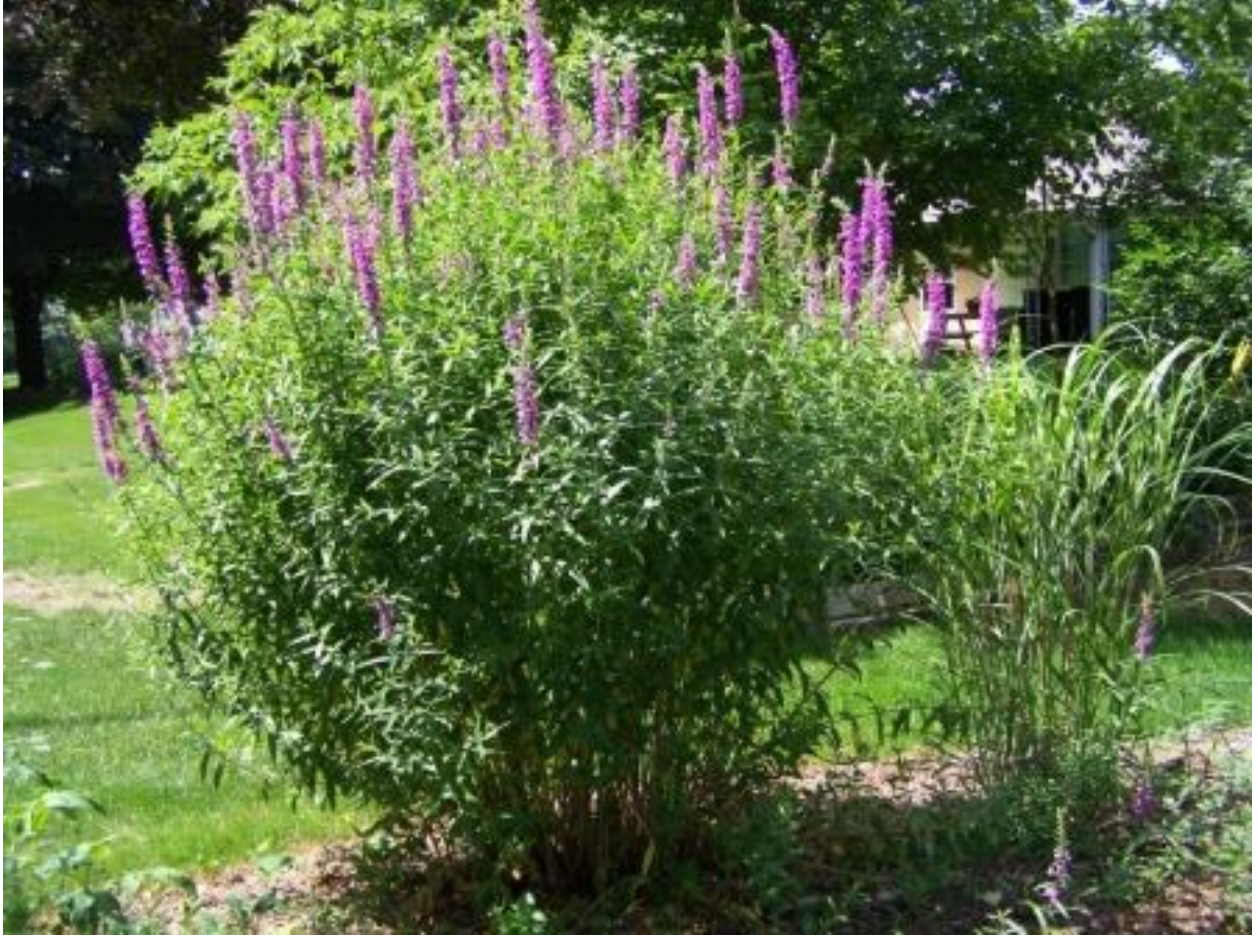

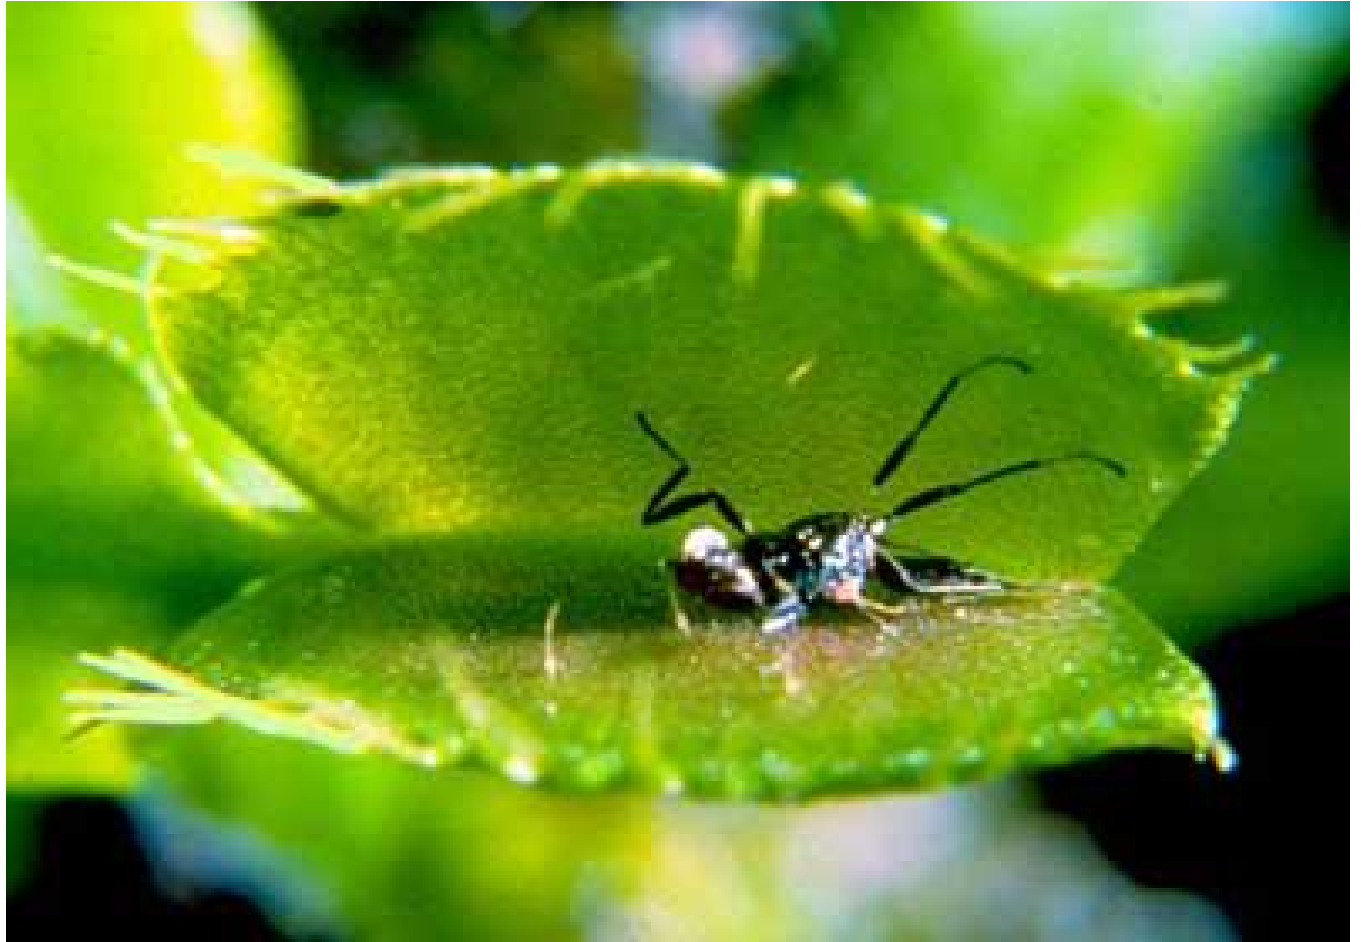

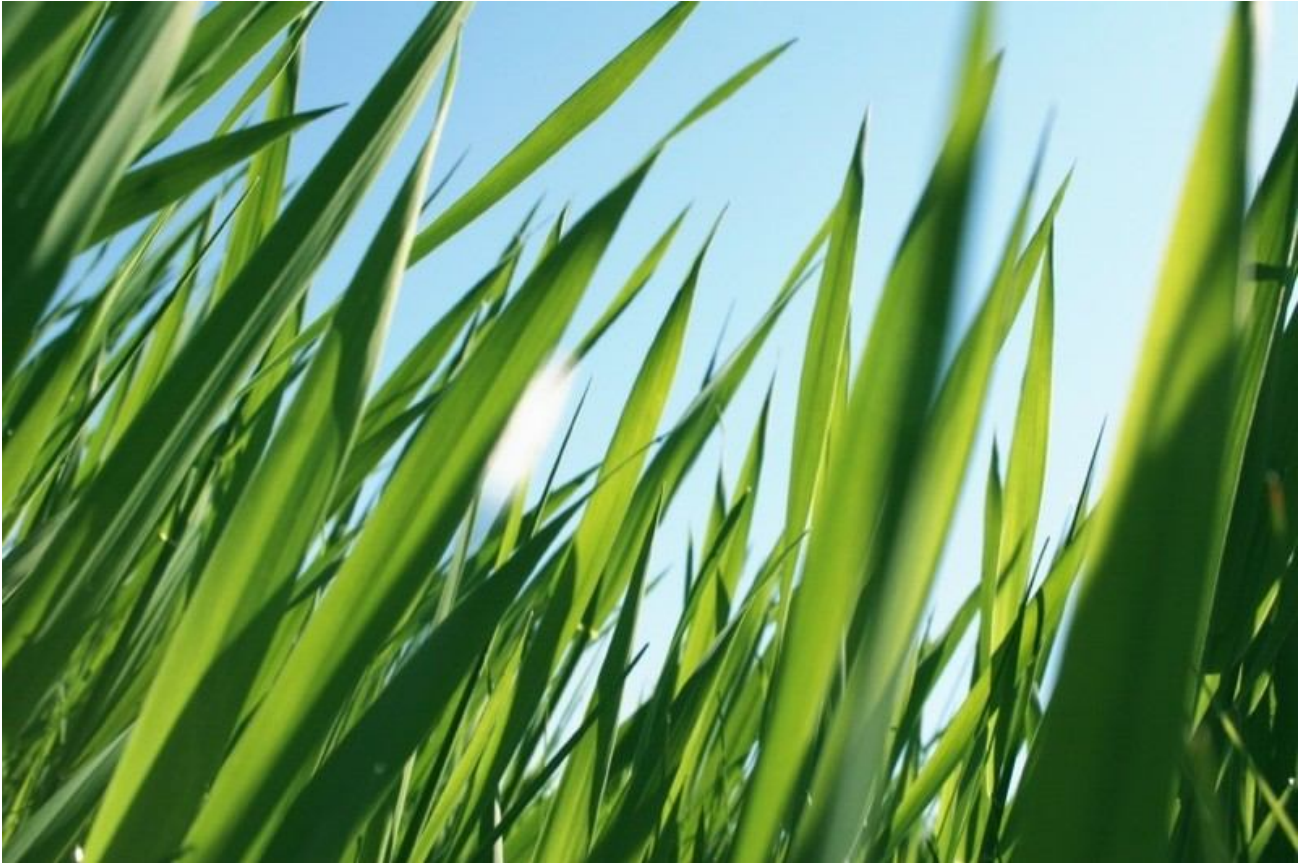

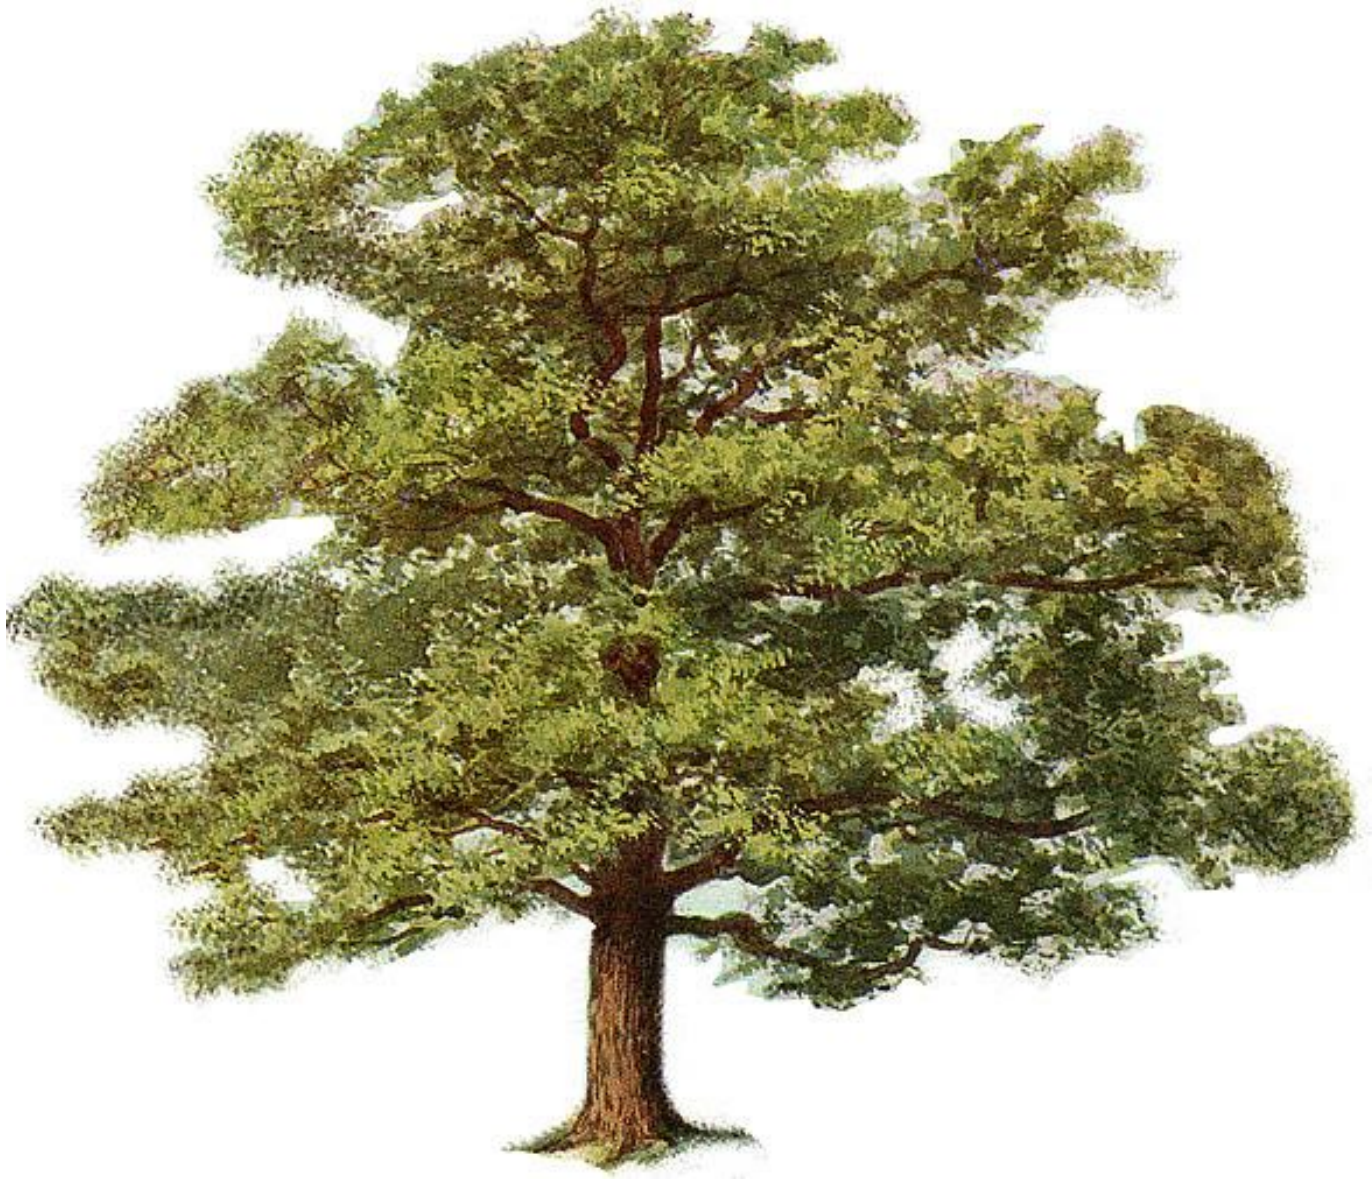



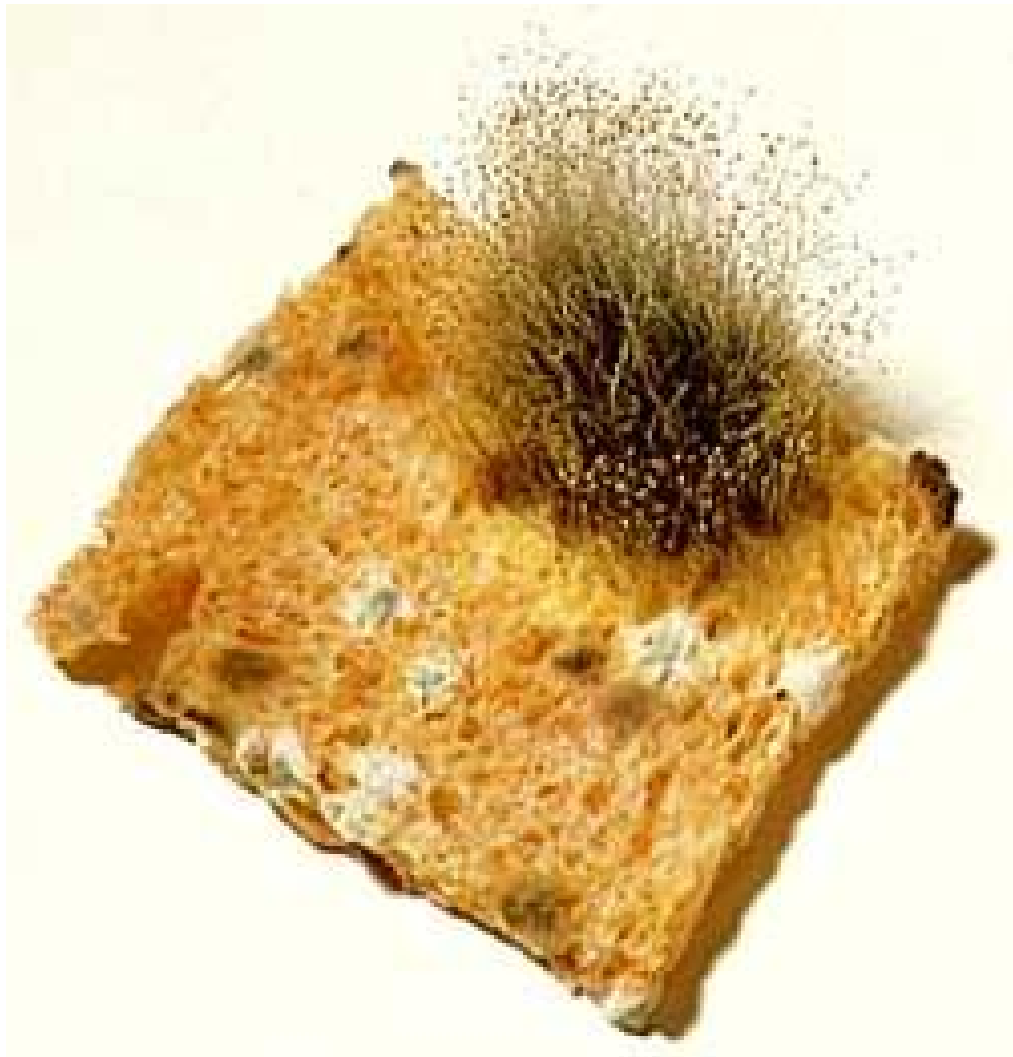

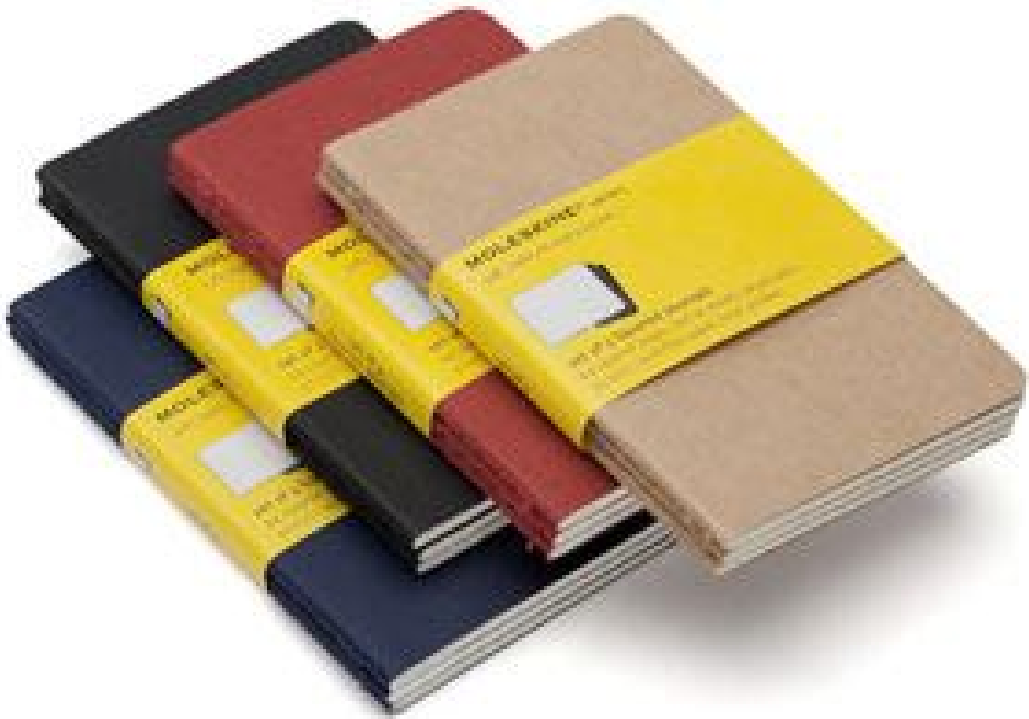

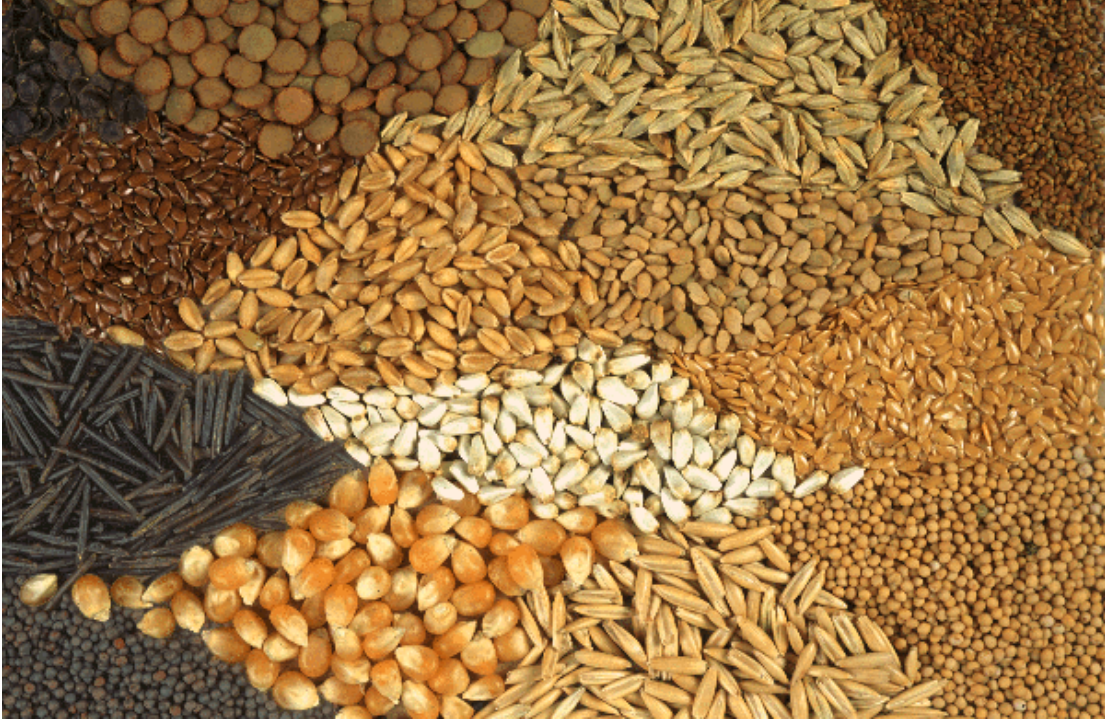

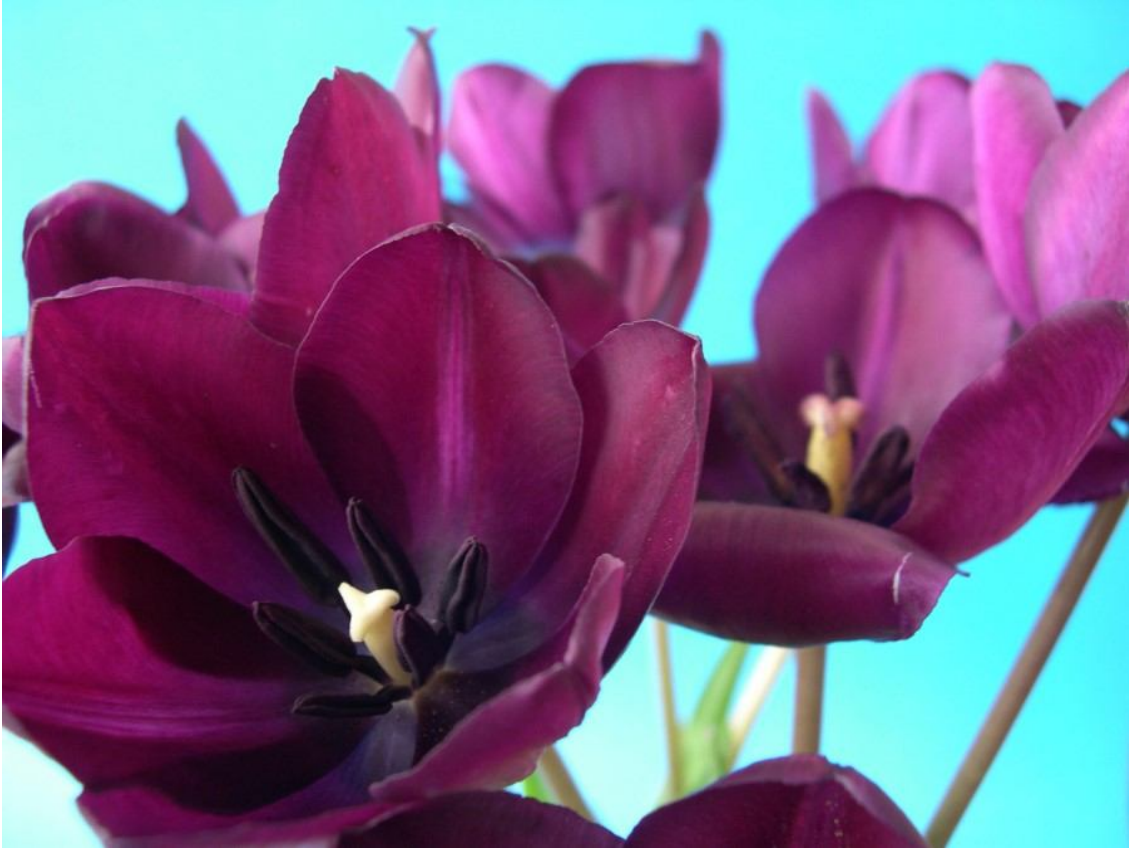

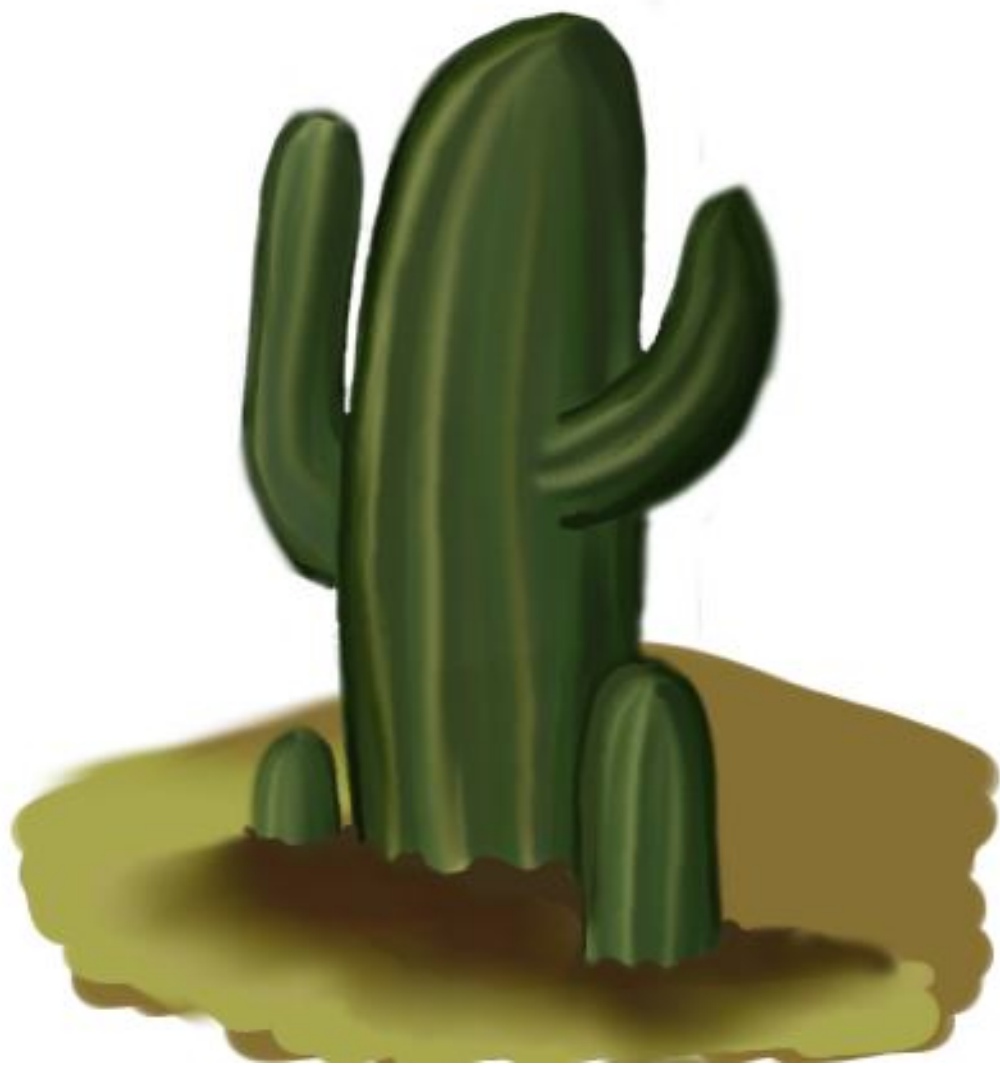

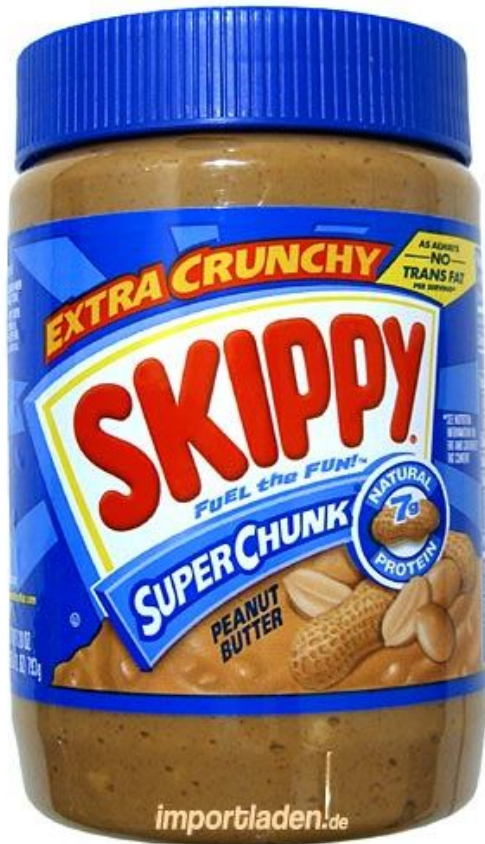

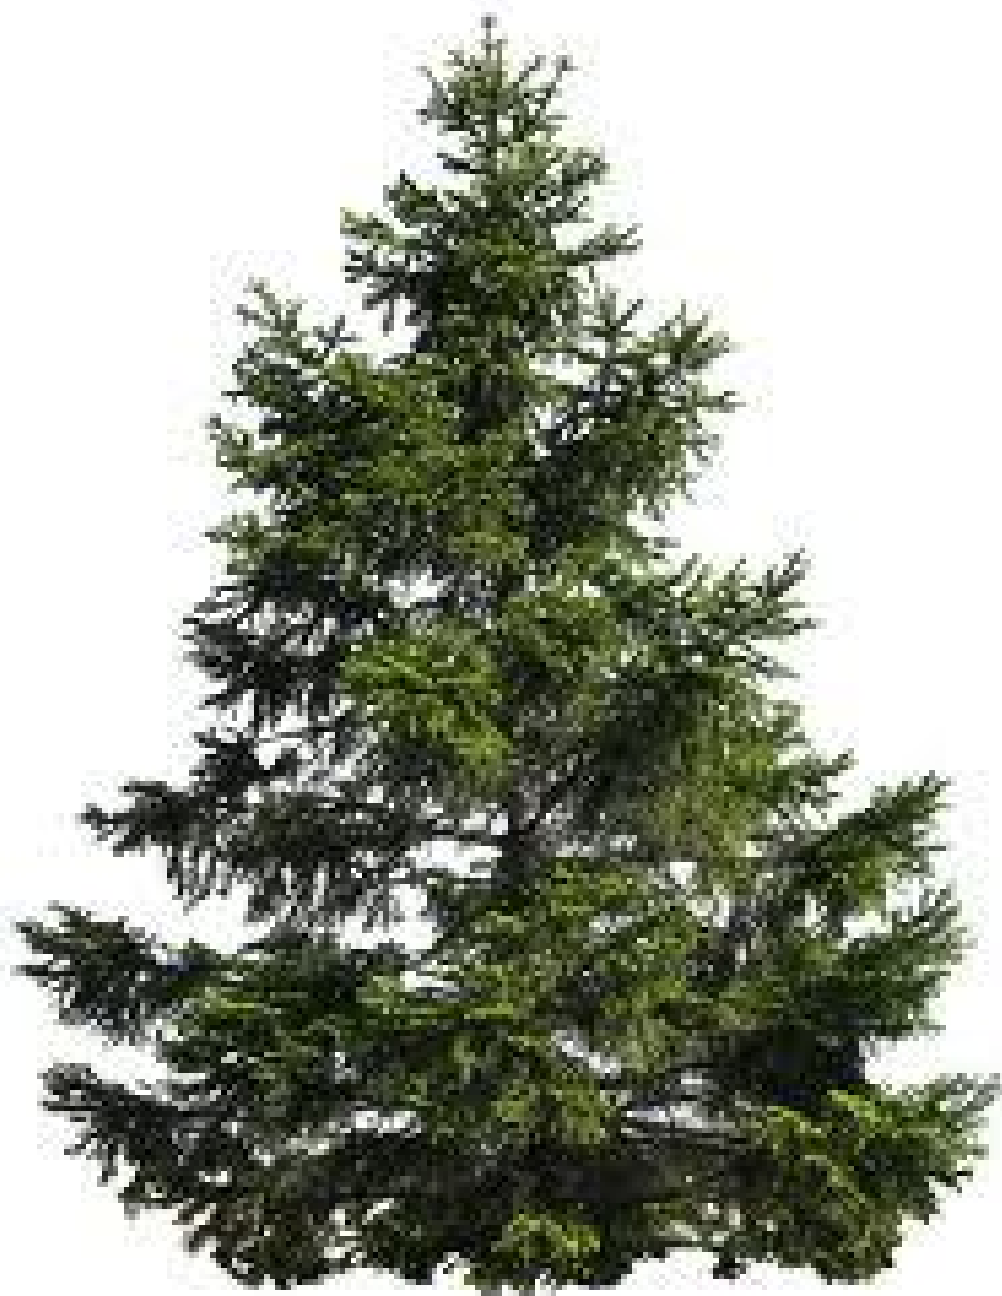

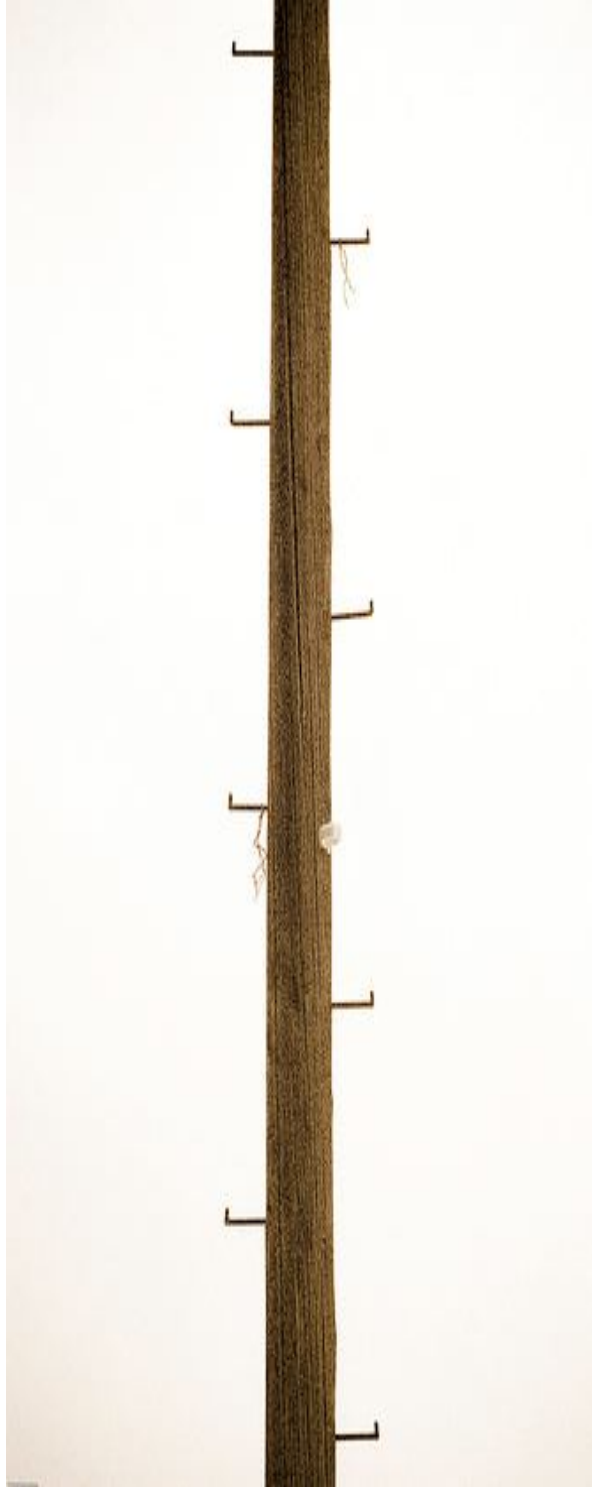



Think about what you know about plants, the parts of plants and the things that plants need to grow. Draw a picture showing these things, labeling as many details as you can.

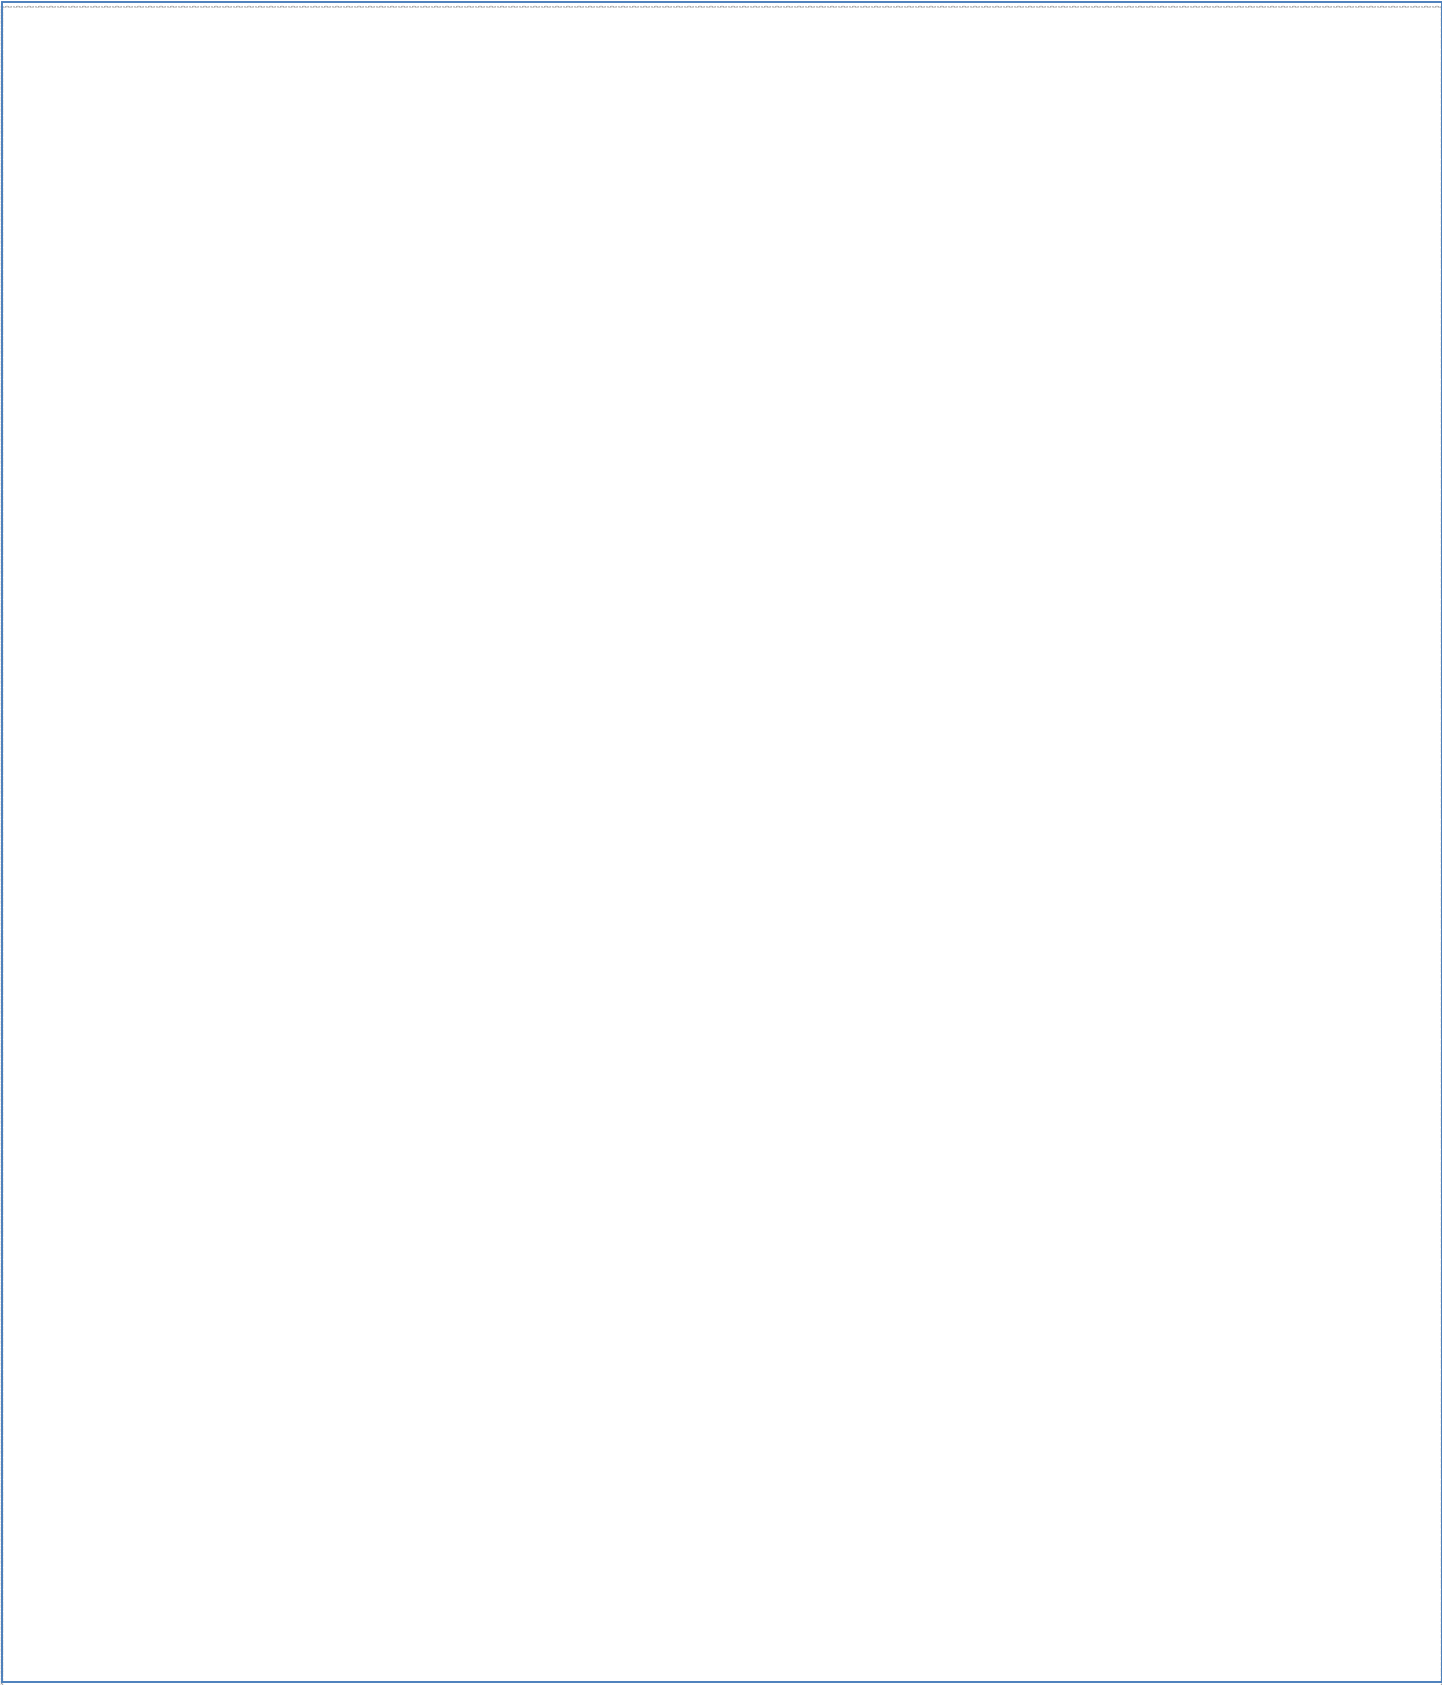

Circle all of the pictures of plants or things that come from plants below:

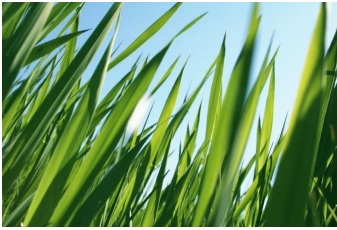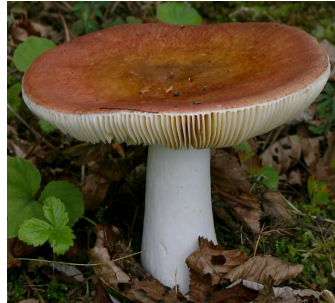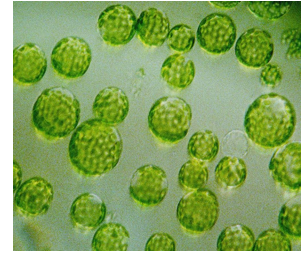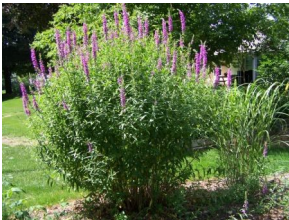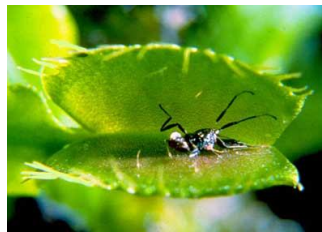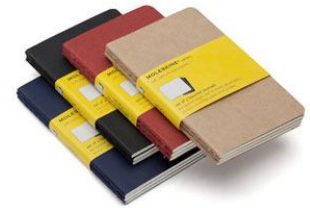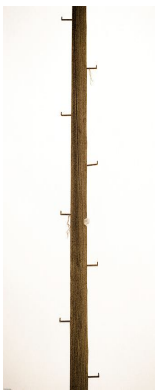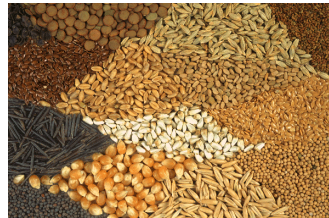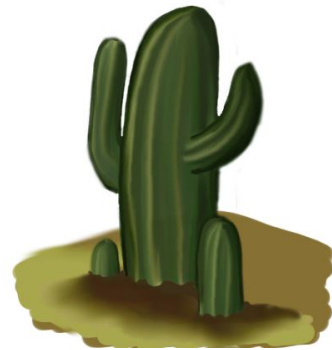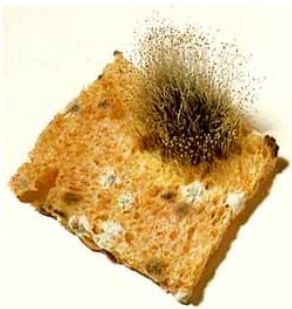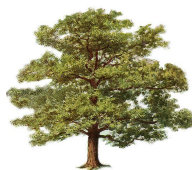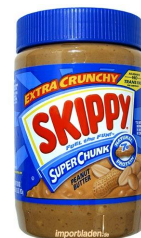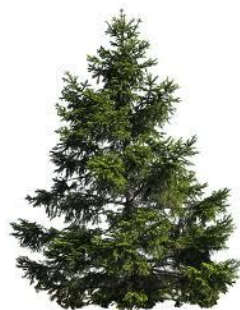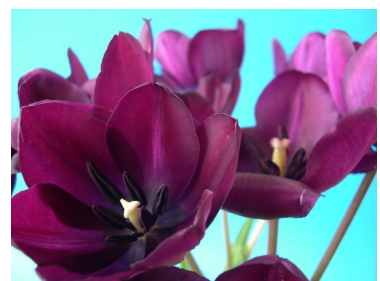

Circle all of the things that a plant needs to grow.

SUN

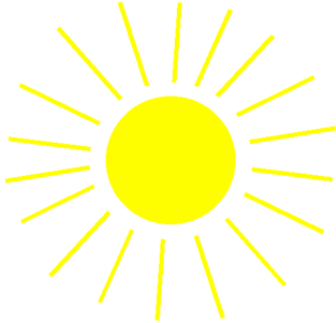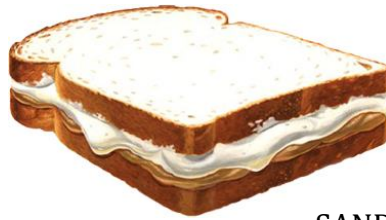

SANDWICH

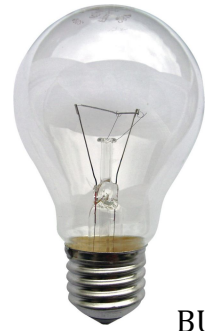

BULB

CEREAL

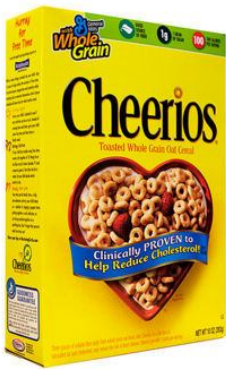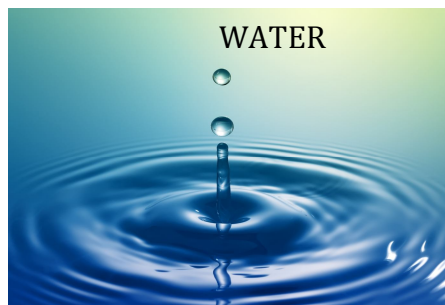

WATER

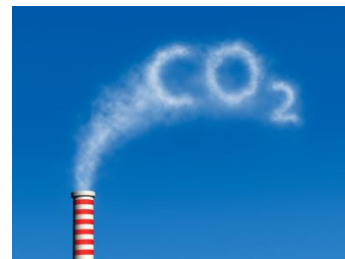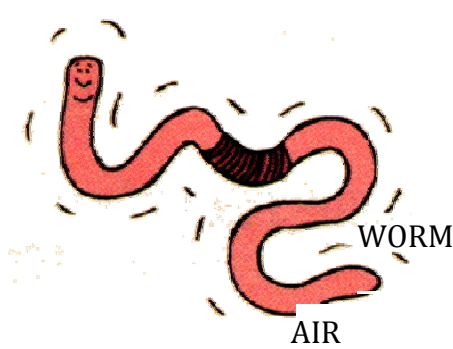

WORM

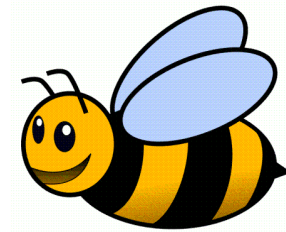

BEE

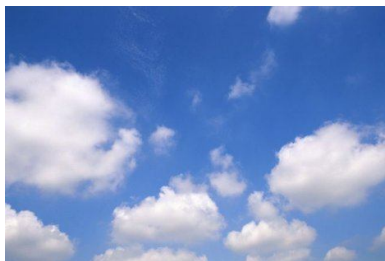

AIR

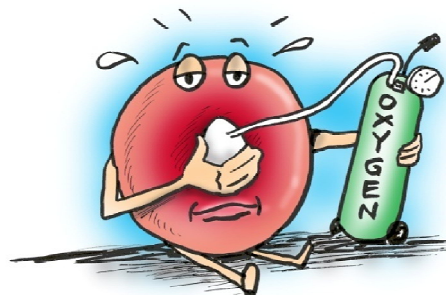

OXYGEN

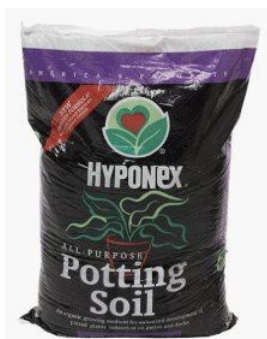

POTTING SOIL

FERTILIZER

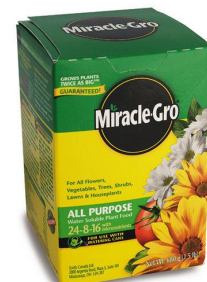

Supplement: combinedsupmats1.pdf [file combinedsupmats1.pdf]
